# Supplementary material
Source: PubMed Central journal article supplement (PMC3882120)
Supplement: NIHMS537007-supplement-Supplemental_Data.pdf [file NIHMS537007-supplement-Supplemental_Data.pdf]

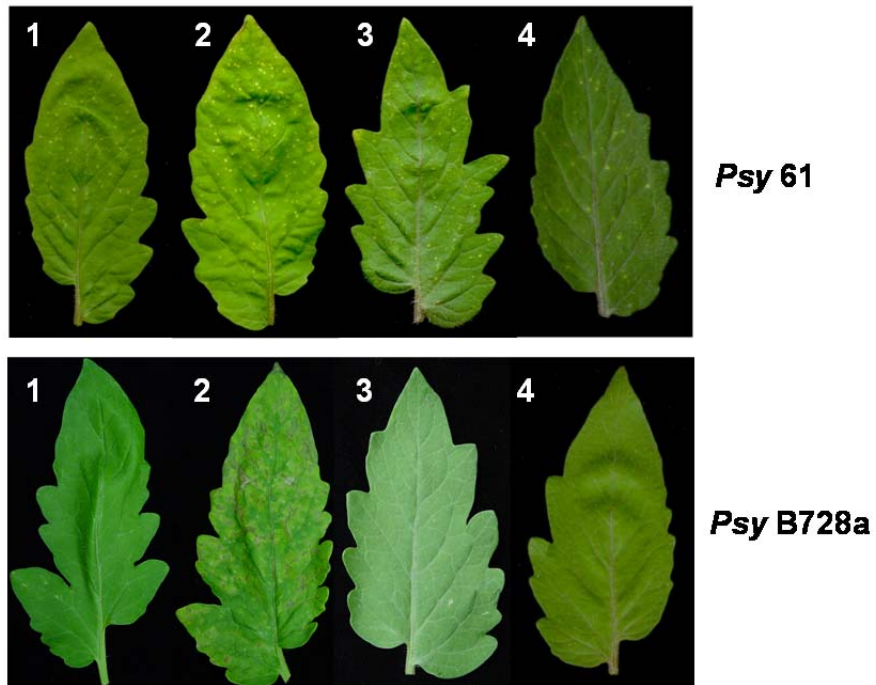

|                  | (1)<br>RG-<br>PtoR | (2)<br>RG-<br>prf3 | (3)<br>Moneymaker | (4)<br>VFNT<br>Cherry |
|------------------|--------------------|--------------------|-------------------|-----------------------|
| <b>Psy 61</b>    | <b>C</b>           | <b>C</b>           | <b>C</b>          | <b>C</b>              |
| <b>Psy B728a</b> | <b>I</b>           | <b>C</b>           | <b>I</b>          | <b>I</b>              |

**Supplementary Fig. S1.** Responses of tomato leaves to two bean pathogens, *Pseudomonas syringae* pv. *syringae* strains 61 and B728a. Disease symptoms on leaves of tomato cultivars Rio Grande-PtoR (1), Rio Grande-prf3 (2), Moneymaker (3) or VFNT Cherry (4) were monitored after vacuum infiltration with  $2 \times 10^8$  CFU/ml of *Psy*61 (upper panel) or *Psy*B728a (lower panel). C, compatible interaction (disease); I, incompatible interaction (no disease).

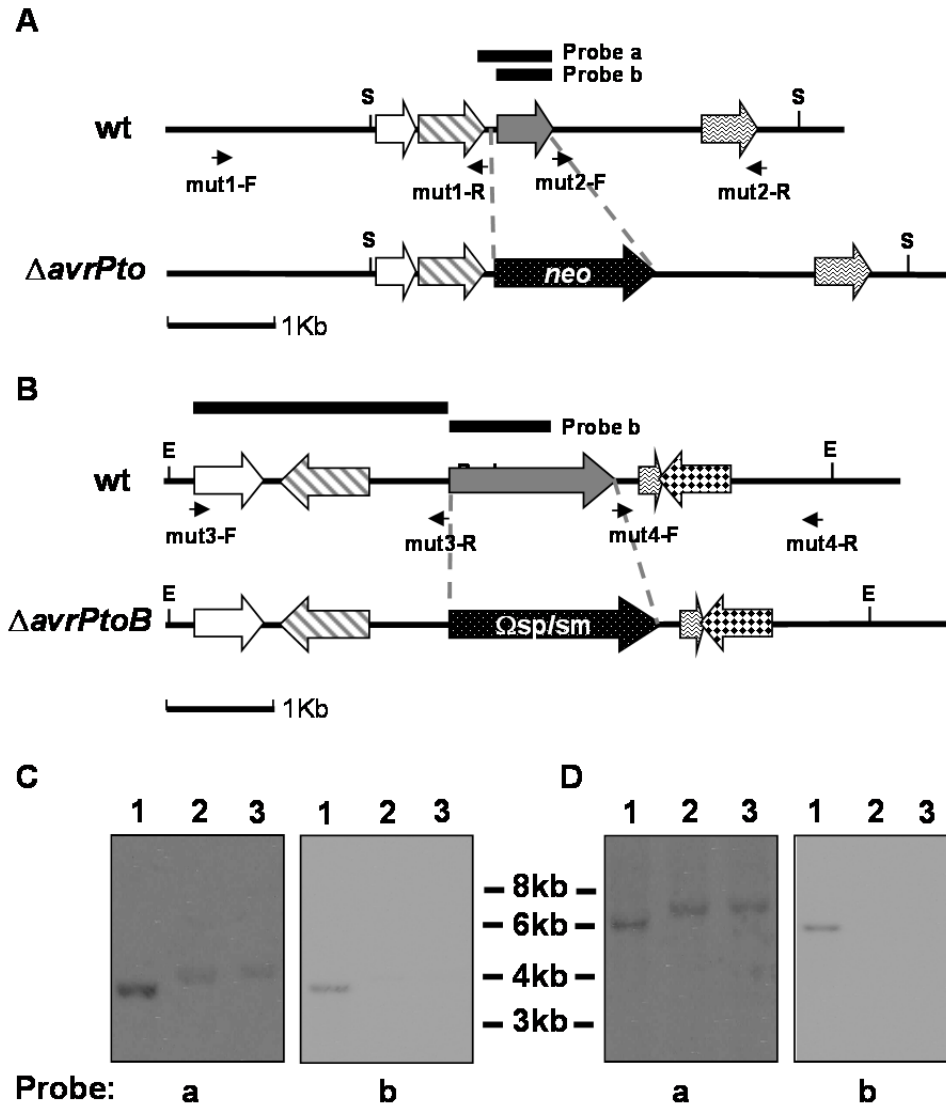

**Supplementary Fig. S2.** Generation of *avrPto*- and *avrPtoB*-deletion mutants of *PsyB728a*. **A**, The gene structures of *avrPto* and **B**, *avrPtoB* of *PsyB728a* and the location of the kanamycin resistance gene or the omega fragment in the derived mutants. Probes used in Southern blot analysis are indicated as bold lines. E: *EcoRI* site; S: *StuI* site. Numbers above the gene structure are the locations in the *PsyB728a* genome. **C**, Southern blot analysis for deletion of *avrPto* in *PsyB728a*. 1, wild-type *PsyB728a*; 2, *PsyB728aΔavrPto*; and 3, *PsyB728aΔavrPtoΔavrPtoB*. **D**, Southern blot analysis for deletion of *avrPtoB* in *PsyB728a*. 1, *PsyB728a* wild-type; 2, *PsyB728aΔavrPtoB*; and 3, *PsyB728aΔavrPtoΔavrPtoB*.

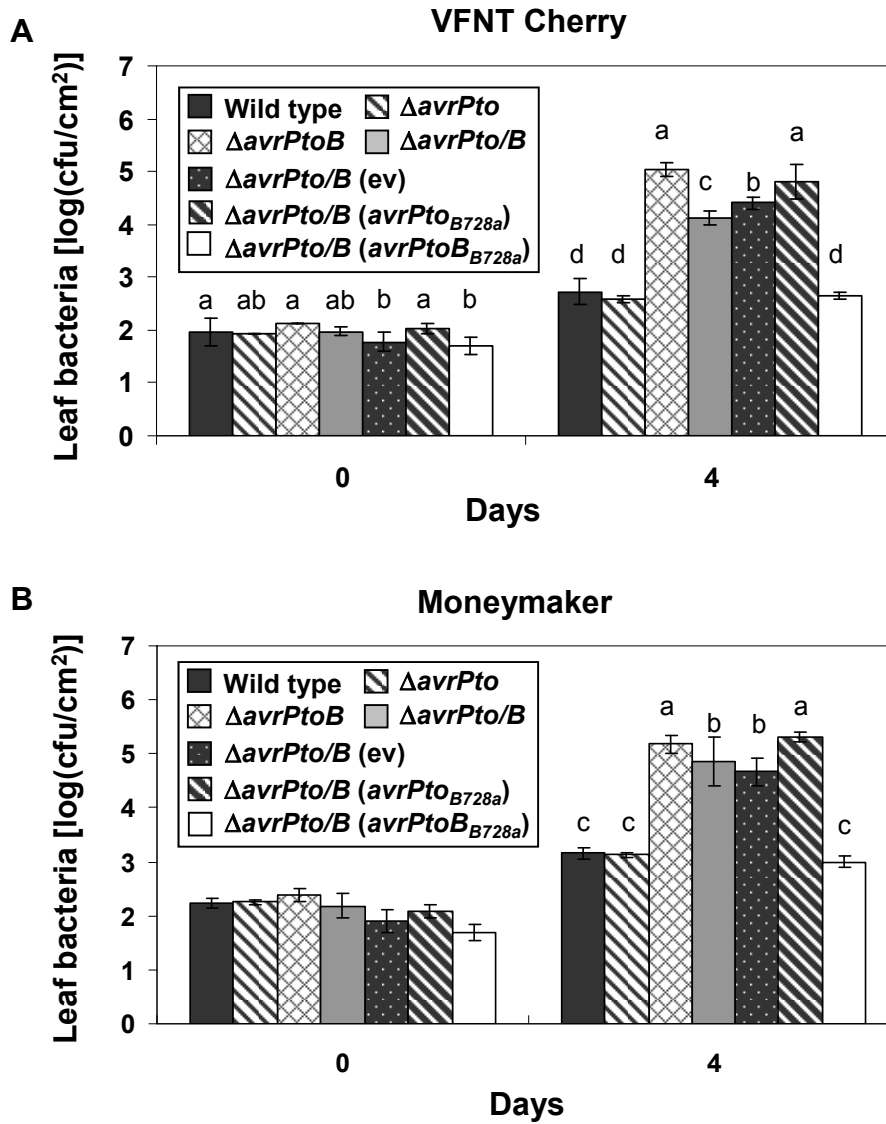

**Supplementary Fig. S3. A**, Responses of leaves of VFNT Cherry and **B**, Moneymaker to *PsyB728a*, its derivative mutants, and each cognate complementary strain. Bacterial populations were measured in tomato leaves at 0 and 4 days postinoculation (dpi) after vacuum infiltration with  $2 \times 10^4$  CFU/ml of *PsyB728a* wild type,  $\Delta avrPto$ ,  $\Delta avrPtoB$ ,  $\Delta avrPto\Delta avrPtoB$  ( $\Delta avrPto/B$ ), and  $\Delta avrPto\Delta avrPtoB$  carrying pCPP45 [ $\Delta avrPto/B(ev)$ ], pCPP45::*avrPto*<sub>B728a</sub> [ $\Delta avrPto/B(avrPto_{B728a})$ ], and pCPP45::*avrPto*<sub>B728a</sub> [ $\Delta avrPto/B(avrPto_{B728a})$ ]. The error bars indicate the standard deviations for three replicates. Data analysis was performed using Duncan's multiple-range test. Means with the same letter above the bars are not different at a significance level of 5%. Each experiment was performed three times with similar results.

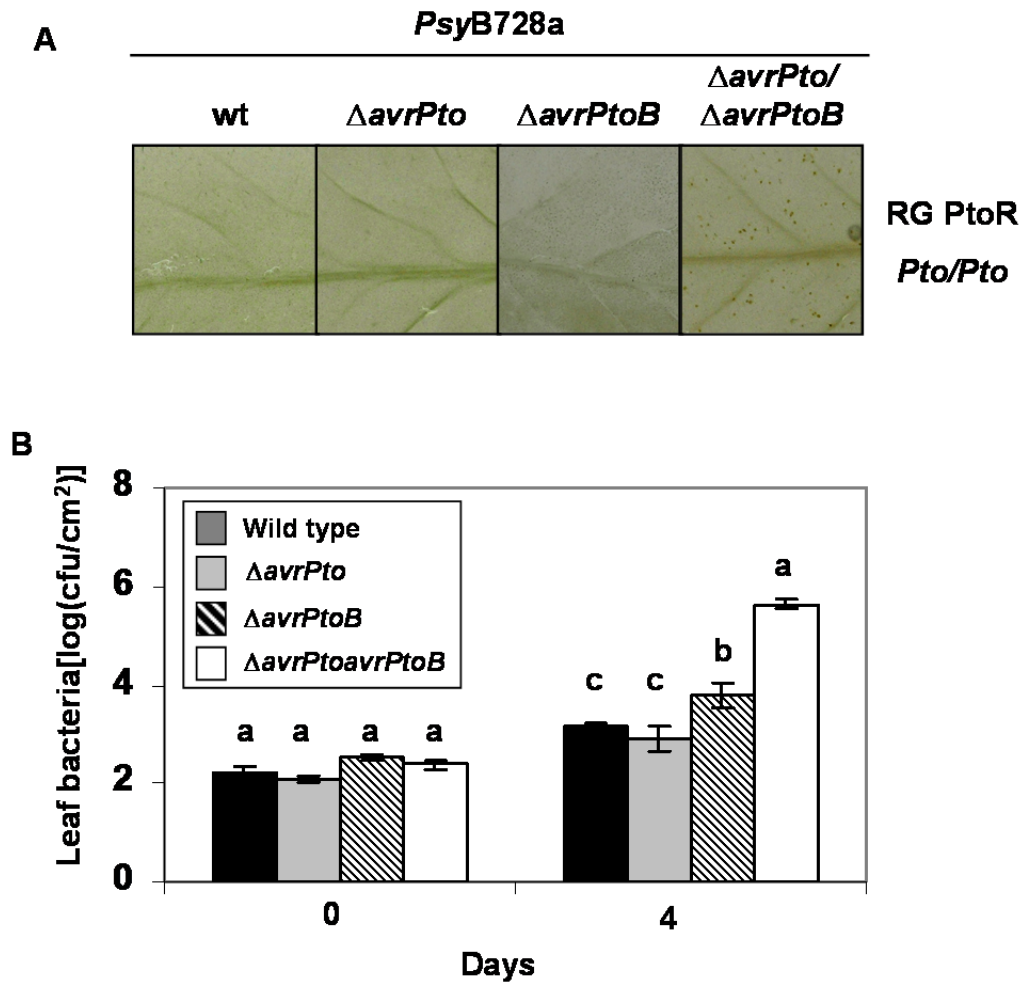

**Supplementary Fig. S4.** Responses of leaves of Rio Grande-PtoR to *PsyB728a* and its derivative mutants. **A**, Disease symptoms were observed only when tomato plants were inoculated with  $2 \times 10^4$  CFU/ml *PsyB728a* $\Delta avrPto$  $\Delta avrPtoB$ . Photographs were taken 7 days after vacuum infiltration. **B**, Bacterial populations in tomato leaves at 0 and 4 days postinoculation. The error bars indicate the standard deviations for three replicates. Data analysis was performed using Duncan's multiple-range test. Means with the same letter above the bars are not different at a significance level of 5%. Each experiment was performed three times with similar results.

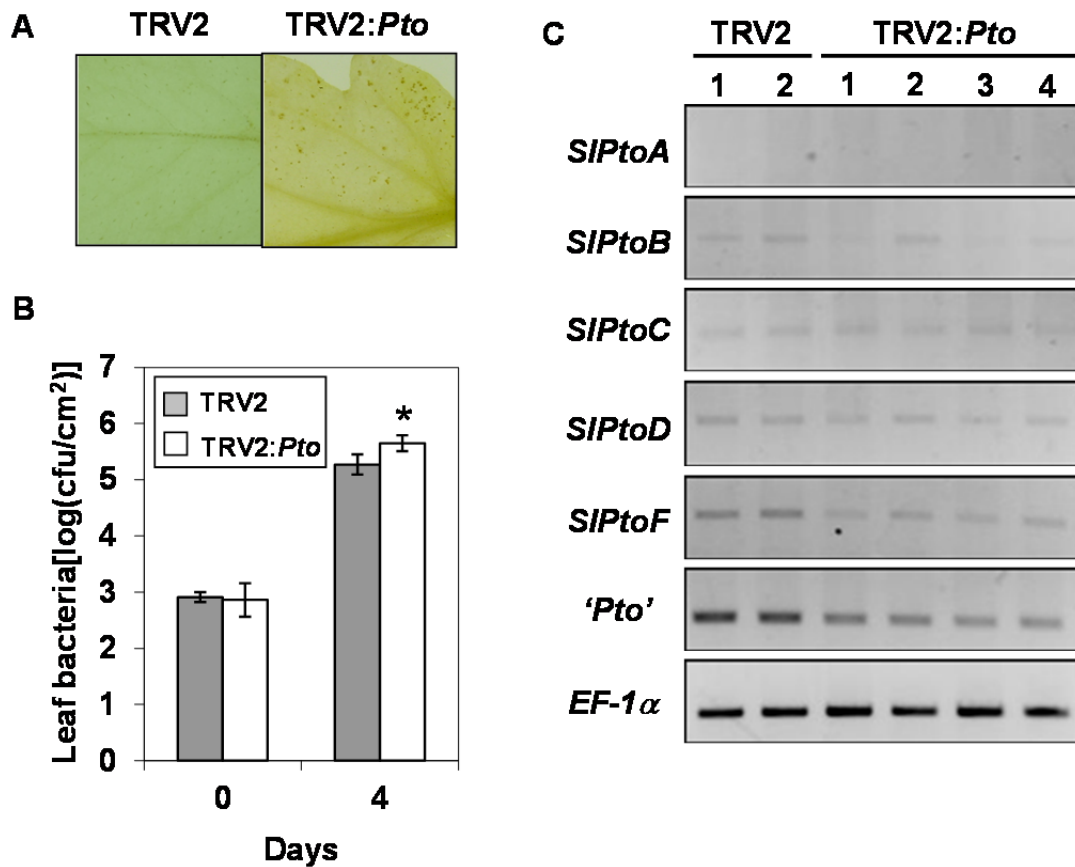

**Supplementary Fig. S5.** Resistance elicited by *avrPtoB728a* is dependent on *Pto* family members. **A**, *PsyB728a* did not trigger resistance on VFNT Cherry that was silenced by tobacco rattle virus (TRV2) VIGS for *Pto* orthologs, and specks were observed 4 days after bacterial inoculation. At 7 days post-inoculation (dpi), chlorophyll was removed from the leaves using ethanol before photographs were taken. **B**, Bacterial populations in VFNT Cherry leaves silenced for *Pto* orthologs and infiltrated with *PsyB728a*. The error bars indicate the standard deviations for three replicates. Data analysis was performed using Student's *t*-test, and an asterisk (\*) indicates significant difference at a level of 5%. Each experiment was performed three times with similar results. **C**, Silencing of *Pto* orthologs in VFNT Cherry was evaluated using semi-quantitative RT-PCR. Primers specific to the *Pto* ortholog shown or that would amplify all *Pto*-like sequences (designated as '*Pto*') were used. Note that VFNT Cherry does not have the *Pto* gene itself. Expression level of *EF-1α* was used as a control.

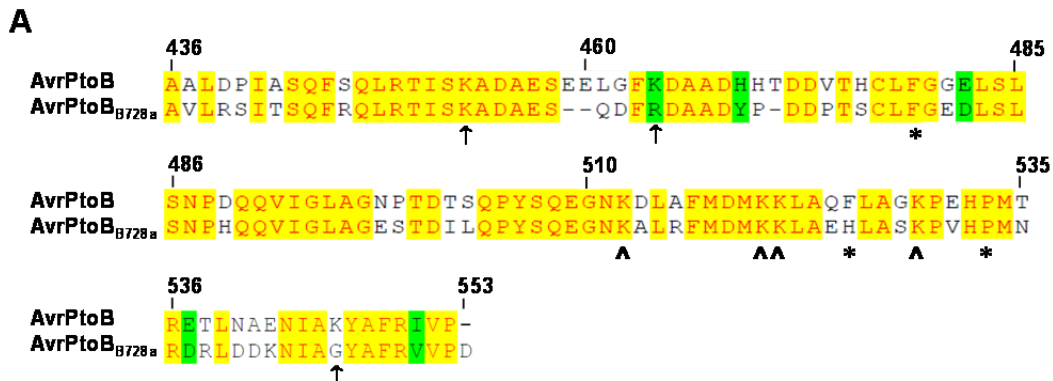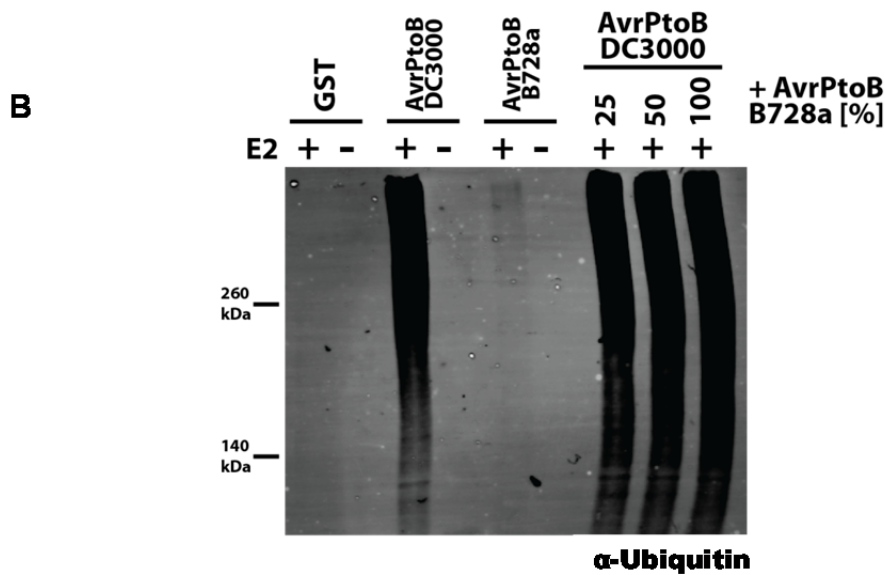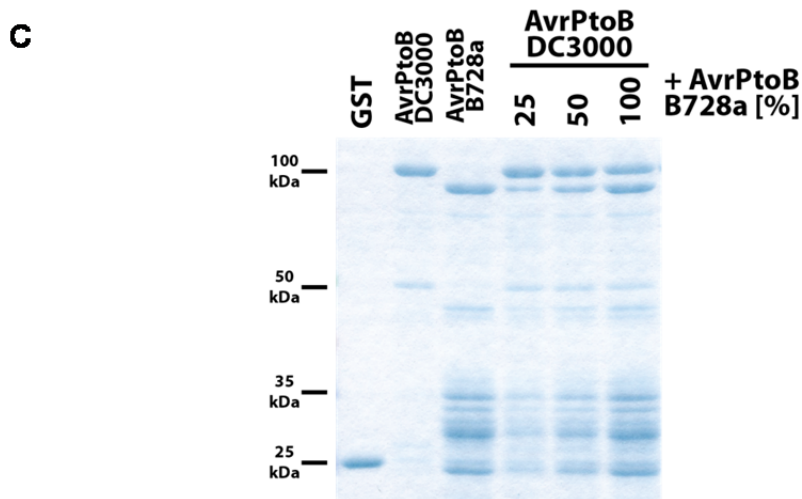

**Supplementary Fig. S6.** AvrPtoB<sub>B728a</sub> protein preparations do not contain a detectable E3-ligase inhibitory activity. **A**, Amino acid sequence alignment of the E3 ligase domains of AvrPtoB and AvrPtoB<sub>B728a</sub>. Alignment was performed using ClustalW program in Vector NTI. Black arrows (↑) indicate lysine residues that do not have a known role in AvrPtoB ubiquitination activity, the carets (^) indicate that substitutions at these lysines cause loss in ubiquitination activity, and stars (\*) represent putative E2-binding sites. **B**, AvrPtoB from *Ps*DC3000 or AvrPtoB<sub>B728a</sub> from *Psy*B728a were purified from *E. coli* as GST fusions and subjected to *in vitro* ubiquitination assays in the presence and absence of E2 conjugating enzyme as described in Fig. 5. To test for the presence of an E3-inhibitory activity in the AvrPtoB<sub>B728a</sub> preparations, increasing amounts of AvrPtoB<sub>B728a</sub> were included in AvrPtoB assay. No inhibitory effect of the AvrPtoB<sub>B728a</sub> preparation on the E3 ligase activity of AvrPtoB samples was observed.

**Table S1.** Primers used in this study

| Primer        | Sequence (5'→3')                        | Note                                                       |
|---------------|-----------------------------------------|------------------------------------------------------------|
| AvrPtoB728a-1 | GGGGTACCTTACTGTCCGCCAAACTCAA            | Anneal to the upstream of <i>hrp</i> box                   |
| AvrPtoB728a-2 | GGTCTAGAGCTACAATCCAGTTCTCTACAAA         | Anneal to downstream of <i>avrPto</i> <sub>B728a</sub> ORF |
| B728amut1-F   | <u>AAGGTACC</u> AGCTCGACATTGCCTTTCTCA   | To generate pΔavrPto <sub>B728a</sub>                      |
| B728amut1-R   | <u>AACTCGAGCCTGGATCCGCCGACACAT</u>      | To generate pΔavrPto <sub>B728a</sub>                      |
| B728amut2-F   | <u>AACTCGAGCTCCTAGCCCCGACCGTAAC</u>     | To generate pΔavrPto <sub>B728a</sub>                      |
| B728amut2-R   | <u>AATCTAGACTATATGAAGGACCCAGCAAAACC</u> | To generate pΔavrPto <sub>B728a</sub>                      |
| B728a-mt1     | <u>AAGGTACCTTGGCGCACTGACCCTGGTGAT</u>   | To generate pΔavrPtoB <sub>B728a</sub>                     |
| B728a-mt2     | <u>AAGATATCGATGGCCCTGCTCCGTTGAT</u>     | To generate pΔavrPtoB <sub>B728a</sub>                     |
| B728a-mt3     | <u>AAGATATCGCATCCCATGAACAGAGACA</u>     | To generate pΔavrPtoB <sub>B728a</sub>                     |
| B728a-mt4     | <u>AAGGATCCTCGACATGGCGAATTGTTG</u>      | To generate pΔavrPtoB <sub>B728a</sub>                     |
| SIPtoA-1      | AGATGCTCTCTCACTTCCGC                    | For RT-PCR                                                 |
| SIPtoA-2      | CACCATCCCCTTCGAAATAT                    | For RT-PCR                                                 |
| SIPtoB-F      | CACAAGGTATTGAAGAGTTC                    | For RT-PCR                                                 |
| SIPtoB-R      | TCTTCTGCGTCTCATCATCA                    | For RT-PCR                                                 |
| SIPtoC-1      | CTCGAGATATGGCGTTTCCTT                   | For RT-PCR                                                 |
| SIPtoC-2      | TGTGCTAAGATGGGTTTGAT                    | For RT-PCR                                                 |
| SIPtoD-F      | TGTCTTCCCACTATGAGCTG                    | For RT-PCR                                                 |
| SIPtoD-R      | AAGTGCATACTCCAGTTTCC                    | For RT-PCR                                                 |
| SIPtoF-1      | GCTTCAAACCTCTTTTGAAAG                   | For RT-PCR                                                 |
| SIPtoF-2      | TCACGTCTGTGGTTTGATAA                    | For RT-PCR                                                 |

\*The recognition sequence of each restriction endonuclease is underlined and as follows: *EcoRI*, GAATTC; *EcoRV*, GATATC; *KpnI*, GGTACC; *HindIII*, AAGCTT; *XbaI*, TCTAGA; *XhoI*, CTCGAG

## SUPPLEMENTARY MATERIALS AND METHODS

### Southern blot analysis.

Genomic DNA (5  $\mu$ g) extracted from *PsyB728a*, *PsyB728a*  $\Delta$ *avrPto<sub>B728a</sub>*, *PsyB728a*  $\Delta$ *avrPtoB<sub>B728a</sub>*, or *PsyB728a*  $\Delta$ *avrPto<sub>B728a</sub>* was digested with *EcoRI* or *StuI* at 37°C overnight before separation in a 1% agarose gel. DNA was then transferred onto a Hybond N+ nylon membrane (Amersham Biosciences, Buckinghamshire, U.K.) with 10 $\times$  SSC (1.5 M NaCl and 0.15 M sodium acetate, pH7.0) by the capillary method. Southern blot analysis was performed using a digoxigenin (DIG) system followed by procedures recommended by the manufacturer (Roche Applied Science, Indianapolis, IN, U.S.A.). Probes used to check the *avrPto* deletions were DNA fragments containing *hrp* promoter and ORF (probe a) and ORF (probe b) of *avrPto<sub>B728a</sub>*. Probes used to confirm the *avrPtoB* deletion are upstream sequence (probe a) and partial ORF (1 to 630 bp; probe b) of *avrPtoB<sub>B728a</sub>*. Prehybridization and hybridization were carried out at 65°C for 4 hours and

overnight, respectively, in a standard hybridization buffer (5 $\times$  SSC, 0.1% (wt/vol) lauroylsarcosine, 0.02% (wt/vol) SDS, and 1% blocking reagent). The membrane was washed twice in 2 $\times$  SSC with 0.1% SDS at room temperature for 5 minutes, and twice in 0.5 $\times$  SSC with 0.1% SDS at 65°C for 15 minutes before incubation of the membrane in the blocking solution (1% blocking reagent in maleic acid buffer, which contains 100 mM maleic acid, 150 mM NaCl, and is adjusted pH7.5) for 30 minutes followed by incubation with a horseradish peroxidase (HRP)-conjugated anti-DIG antibody (1:10,000 dilution) for 30 minutes. After washing twice with the washing buffer (1 $\times$  maleic acid buffer and 0.1% Tween 20) for 15 minutes each, CSPD was applied to the membrane, incubated at 37°C for 10 minutes, and then the probe-target hybrids were detected using a G-Box systems (Syngene, Cambridge, U.K.).
